# Supplementary material for: Effects of ChatGPT-Based Artificial Intelligence Training on Artificial Intelligence Literacy, Attitudes, and Acceptance Among Midwifery Students: A Mixed-Methods Study
Source: Research Square preprint supplement (doi:10.21203/rs.3.rs-8689449/v1), 2026-02-20
Supplement: Supplementary file 1 [file 73ef393f6ddda59d728ed2b4.docx]

**Supplement 1. Assignment evaluation criteria**

| **No** | **Criterion** | **Description** | **0** | **1** | **2** |
| --- | --- | --- | --- | --- | --- |
| 1 | Clarity and Accuracy of Prompts | Does the given prompt clearly define the high-risk pregnancy condition and the need for counseling? Are the inputs provided to the AI understandable, targeted, and sufficient? | Unclear | Partially clear | Clear and goal-oriented |
| 2 | Scientific and Ethical Appropriateness | Are the retrieved pieces of information scientifically valid, up to date, and in accordance with professional ethical principles? Are key principles such as confidentiality and autonomy considered? | Inappropriate | Partially appropriate | Fully appropriate |
| 3 | Accuracy and Integration of AI Responses | How accurate are the AI-generated responses, and how meaningfully do they contribute to the counseling plan? Is the content well-integrated into the assignment? | Minimal contribution | Partially integrated | Accurate and meaningful |
| 4 | Awareness and Reflection on AI Use | Has the student correctly identified AI’s contribution? Have they specified which information came from the AI and how it was used? | Not mentioned | Partially explained | Clearly articulated |
| 5 | Critical Evaluation | Did the student critically evaluate the information received from the AI instead of using it blindly? Were corrections made if necessary? | None | Limited evaluation | Evident critical approach |

Each criterion is scored between 0–2 points. The total score is calculated out of 10 points.

**Interpretation of Total Score:**

- **8–10 points** → High-level conscious and ethical use of AI
- **5–7 points** → Basic but improvable use of AI
- **0–4 points** → Inadequate or ethically problematic use of AI
